# Supplementary figures and images for: Progressive myoclonic epilepsy due to rare mitochondrial ND6 mutation, m.14487T>C
Source: HighWire-hosted journal article supplement (doi:10.1136/bmjno-2021-000180), 2021-06-01

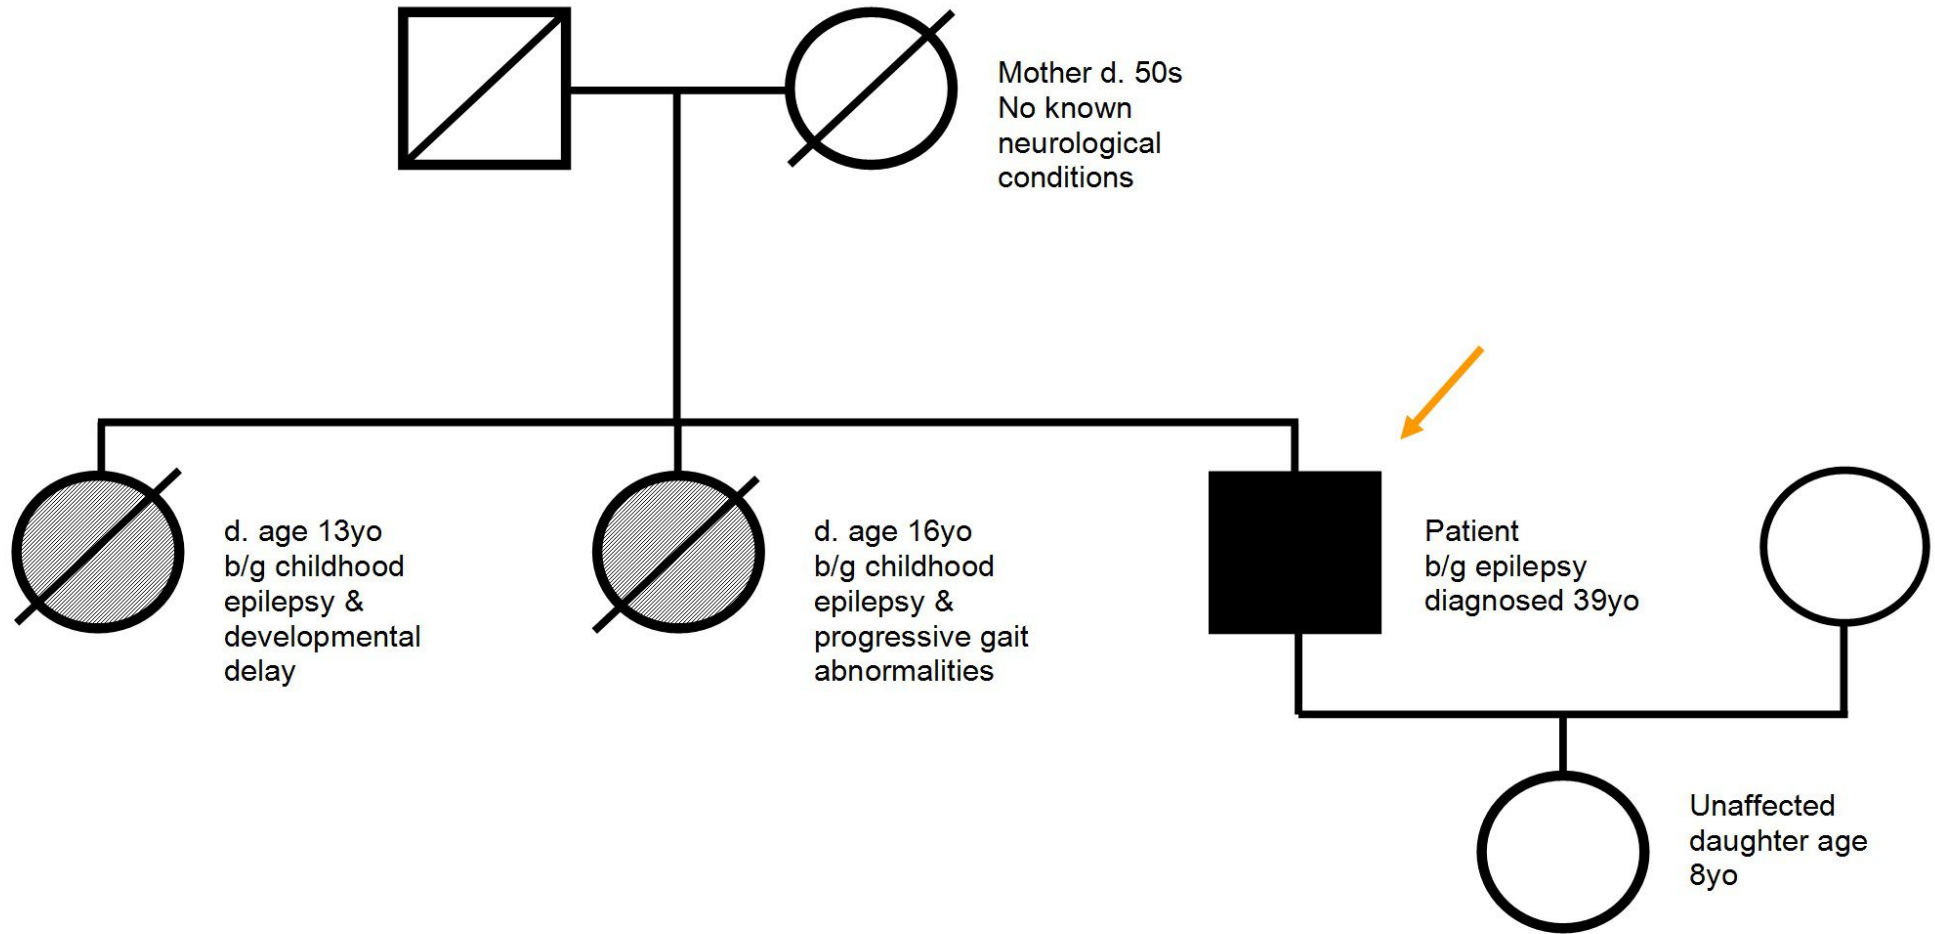

Supplement: bmjno-2021-000180supp001_data_supplement.pdf [file bmjno-2021-000180supp001_data_supplement.pdf]
